# Supplementary material
Source: Research Square preprint supplement (doi:10.21203/rs.3.rs-9160077/v1)
Supplement: Supplementary file 1 [file 2d0c878fbc735c305d6ded0f.pdf]

# Supplementary Information for

## *Accounting for imperfect displacement in life cycle assessment for refurbishing and remanufacturing operations*

Submitted to: *Journal of Industrial Ecology*

Antonio Cavallin Toscani\*, Vishal Agrawal, Atalay Atasu, Luk N. Van Wassenhove

\* Corresponding author

Affiliations: University of Padova, Padova, Italy. INSEAD, Fontainebleau, France.

E-mail address: [antonio.cavallintoscani@insead.edu](mailto:antonio.cavallintoscani@insead.edu)

## Appendix A – Economic Model Details

### A.1 Derivation of Demand Functions

Based on the customer behavior model described in Section 2.2 of the manuscript – refer to Table 1 for the model notation – and illustrated in Figure 2, we can define two critical willingness-to-pay (WTP) levels, denoted by  $\theta_1$  and  $\theta_2$  respectively, such that:

1. Customers with WTP  $\theta > \theta_1$  buy the new product;
2. Customers with WTP  $\theta_2 < \theta < \theta_1$  buy the remanufactured product;
3. Customers with WTP  $0 < \theta < \theta_2$  remain inactive.

As illustrated in the upper panel of Figure 2,  $\theta_1$  and  $\theta_2$  can be characterized as follows:

- $\theta_1 = \theta \mid U_n(\theta) = U_r(\theta)$
- $\theta_2 = \theta \mid U_r(\theta) = 0$

Using the utility functions specified in equations (3) in the manuscript, we derive:

- $\theta_1 = \theta \mid \theta - p_n = \delta \cdot \theta - p_r \rightarrow \theta_1 = \frac{p_n - p_r}{1 - \delta}$
- $\theta_2 = \theta \mid \delta \cdot \theta - p_r = 0 \rightarrow \theta_2 = \frac{p_r}{\delta}$

As illustrated in the lower panel of Figure 2, we can finally derive the demand functions as follows:

$$q_n^R(p_n, p_r) = \frac{B - \theta_1}{B}; \quad q_r^R(p_n, p_r) = \frac{\theta_1 - \theta_2}{B} \quad (\text{A1})$$

These lead, with some simple manipulation, to the equations (4) in the manuscript.

### A.2 Solution to the Profit Maximization Problem – Karush-Kuhn-Tucker Analysis

Given the optimization problem presented in the manuscript – see expressions (5) – the single inequality constraint on the supply of remanufactured products activates the Karush-Kuhn-Tucker (KKT) analysis.

Introducing a multiplier  $\lambda \geq 0$  for the supply constraint, the *Lagrangian* is:

$$\mathcal{L}(p_n, p_r, \lambda) = q_n(p_n - c_n) + q_r(p_r - c_r) - \lambda(q_r - \alpha q_n) \quad (\text{A2})$$

The multiplier  $\lambda$  has the economic interpretation of the shadow value of an additional unit of remanufacturing capacity: it equals the marginal profit gain from relaxing the supply constraint.

### KKT Conditions

The KKT first-order necessary conditions for optimality are:

- *Stationarity with respect to  $p_n$*

$$\frac{\partial \mathcal{L}}{\partial p_n} = 0 \rightarrow c_n - c_r + B(1 - \delta) - \lambda(1 + \alpha) - 2p_n + 2p_r = 0 \quad (\text{A3})$$

- *Stationarity with respect to  $p_r$*

$$\frac{\partial \mathcal{L}}{\partial p_r} = 0 \rightarrow c_r - c_n \delta + \lambda(1 + \alpha \delta) + 2\delta p_n - 2p_r = 0 \quad (\text{A4})$$

- *Complementary slackness*

$$\lambda(\alpha q_n - q_r) = 0, \quad \lambda \geq 0, \quad \alpha q_n - q_r \geq 0 \quad (\text{A5})$$

Condition (A5) forces one of two cases:

- $\lambda > 0$  (*constrained regime*): the supply constraint binds, i.e.,  $q_r = \alpha q_n$ ; an additional first-order condition must be satisfied.
- $\lambda = 0$  (*unconstrained regime*): the supply constraint is slack; prices are set independently.

We report below the solution in each regime.

### Constrained Regime ( $\lambda > 0$ , supply binds)

Here, the system (A3)-(A4), together with  $q_r = \alpha q_n$ , yields the constrained optimum presented in expressions (6) in the manuscript, with:

$$\lambda^* = \frac{c_n(1+\alpha)\delta - B\alpha(1-\delta)\delta - c_r(1+\alpha\delta)}{1+\alpha(2+\alpha)\delta} \quad (\text{A6})$$

where  $\lambda^* > 0$  holds if and only if:

$$B < \frac{2c_n\delta - c_r(1+\delta)}{\delta(1-\delta)}; \text{ or if } B > \frac{2c_n\delta - c_r(1+\delta)}{\delta(1-\delta)} \text{ and } \alpha < \frac{c_r - c_n\delta}{(c_n - c_r - B(1-\delta))\delta} \quad (\text{A7})$$

The constrained profit is:

$$\Pi_{con}^* = \frac{(B - c_n - \alpha c_r + \alpha B \delta)^2}{4(B + \alpha(2 + \alpha)B\delta)} \quad (\text{A8})$$

### Unconstrained Regime ( $\lambda = 0$ )

Setting  $\lambda = 0$  in (A3)-(A4) and solving jointly leads to the optimal prices and corresponding optimal quantities presented in expressions (7) in the manuscript.

This case occurs if and only if  $0 < q_r < \alpha q_n$ , i.e.:

$$\frac{\delta c_n - c_r}{2B\delta(1-\delta)} < \alpha < \frac{B - c_n + c_r - B\delta}{2B(1-\delta)} \quad (\text{A9})$$

which simplifies to:

$$B > \frac{2c_n\delta - c_r(1+\delta)}{\delta(1-\delta)} \text{ and } \alpha > \frac{c_r - c_n\delta}{(c_n - c_r - B(1-\delta))\delta} \quad (\text{A10})$$

The unconstrained profit is:

$$\Pi_{uncon}^* = \frac{(B - c_n)^2\delta + (c_r - B\delta)(c_r + (B - 2c_n)\delta)}{4B(1-\delta)\delta} \quad (\text{A11})$$

### Regime Thresholds

The relationship between the maximum WTP for the new product  $B$  or the recovery rate  $\alpha$  and the other model parameters determines which regime applies (see expressions A7 and A10). The *constrained regime* is binding if either of the following conditions holds:

- *Scenario A: Low-WTP*  $\rightarrow B$  is below the critical threshold:

$$B \leq \frac{2c_n\delta - c_r(1 + \delta)}{\delta(1 - \delta)}$$

OR

- *Scenario B: High-WTP*  $\rightarrow B$  exceeds the threshold, requiring a strictly bound  $\alpha$ :

$$B > \frac{2c_n\delta - c_r(1 + \delta)}{\delta(1 - \delta)} \text{ and } \alpha \leq \frac{c_r - c_n\delta}{(c_n - c_r - B(1 - \delta))\delta}$$

If both  $B$  and  $\alpha$  exceed the indicated critical thresholds, the *unconstrained regime* applies.

## **Appendix B – Life Cycle Assessment Details for the Case Study**

### **B.1 Life Cycle Inventory Process**

To calculate the inventory of the *Production* phase for the new product, we exploded the bill of materials (BoM; including packaging) provided by the company and linked each low-level code/item (purchased component, sub-component, or raw material) to a relevant *ecoinvent* dataset or group of datasets representing its upstream production. Following the Environmental Product Declaration (EPD) study carried out by the company (Schneider Electric, n.d.), we increased the mass of low-level items by a specific factor to account for losses in the assembly process, especially for items made of plastics, metals, and paper/cardboard. This loss factor is computed and regularly updated by the company using average facility-level data. The end-of-life treatment of assembly residues is included in the *Production* phase and modeled following the approach described below for the *Disposal* phase. The transportation of all items from upstream suppliers to the assembly site – located in China – was modeled assuming transport by articulated lorry over 3,500 km, as recommended by the relevant Product Category Rules (PCR) for intracontinental transport (P.E.P. Association, 2015). Like the EPD study, we neglected electricity consumption for the assembly process due to the lack of reliable data and its expected negligible contribution to the overall results. Table A1 provides the aggregate list of *ecoinvent* datasets used and associated

total values (*Production or Recovery* section, *New Product* column). For confidentiality reasons, we cannot disaggregate this further into the specific reference flows for all materials/components. To calculate the inventory of the *Recovery* phase for the remanufactured product, we modeled the following processes: the reverse logistics to take the product back and the upstream production of spare parts needed for remanufacturing. We instead excluded the electricity consumption of the remanufacturing process itself (for inspections, dismantling, re-assembly, and testing activities). Interviews with company personnel revealed that this was negligible. For the reverse logistics, we assumed transportation by lorry over 600 km, an average value indicated by the company to capture the distance between a generic European customer and the repair center – located in France. To obtain the *tkm* value, we estimated the net product weight by subtracting the packaging weight from the new product weight. Regarding the spare parts, they can vary based on the conditions of the collected product, which are inspected upon its arrival at the repair center. The repair center has kept track of the specific spare parts that have been replaced in all taken-back products since the inception of the refurbishing program. We used this data to identify all potential spare parts and derive their average replacement frequencies for the product studied. Hence, we carved out a subset of the BoM containing only the spare parts needed for remanufacturing and corrected their reference flows based on their replacement frequencies. For example, if a given component was replaced in only half of the remanufactured products, we discounted its quantity by 0.5<sup>1</sup>. The reduced BoM further included a whole new packaging set. We leveraged the same datasets and assumptions used for the new product to model the production and upstream transportation of raw materials/components making up the spare parts (including the generation and disposal of assembly residues). The list of linked *ecoinvent* datasets and associated total values is reported in Table A1 (*Production or Recovery* section, *Remanufactured Product* column).

To calculate the inventory of the *Distribution* phase, we modeled the following transportation processes: a) articulated lorry from the assembly site to the departure port in China – around 140 km; b) container ship from the departure port to the arrival port in France – around 19,110 km; c) articulated lorry from the arrival port to the company distribution center (new product) or repair center (remanufactured product) in France – around 120 km; d) articulated lorry from the distribution/repair center to a generic distributor in Europe – 600 km; e) lorry from the distributor to a generic customer in Europe – 200 km. The PEP PCRs (2015) include processes a), b), c) in the *Production* phase (called *Manufacturing* therein), which is another reason for the deviation of our results from the EPD results (Schneider Electric, n.d.). Distances for the processes a), b), c) above represent true values, whereas distances for d) and e) represent average values, assumed based on the company's general logistic model in Europe. For the new product, all transportation processes concern the full product (including packaging), whose weight was multiplied by the relevant distances to obtain *tkm* values. For the remanufactured product, processes a), b), and c) concern only the spare parts (whose weight was discounted by their replacement frequencies as in the *Recovery* phase), whereas d) and e) concern the full product. Table A1 reports the list of linked *ecoinvent* datasets and associated values for both the new and remanufactured products (*Distribution* section).

To calculate the inventory of the *Use* phase, we estimated the electricity consumption of the variable speed drive by taking the same average power ratings and use scenario (namely, 80% of the time in active mode and 20% in standby mode, respectively) reported in the EPD (Schneider Electric, n.d.). Considering the 10-year lifetime specified by the functional unit, this yields a total

---

<sup>1</sup> This approach grounded on primary data is more accurate than other approaches used for remanufacturing, like considering all potential spare parts to represent a sort of worst-case scenario (Ardente et al., 2018).

value of around 31,115 kWh. As indicated in the main text, this is the same for new and remanufactured products, as the same use span, conditions, and energy efficiency are assumed in the base case. Like the EPD study, we considered a generic European customer and modeled the supply of low voltage electricity from the grid using a relevant *ecoinvent* dataset – reported in Table A1 (*Use* section).

To calculate the inventory of the *Disposal* phase, we matched each low-level code in the BoM (including packaging materials) with a specific waste stream, which we then modeled using relevant *ecoinvent* datasets representing general treatment processes for that stream<sup>2</sup>. For the new product, this procedure refers to the full BoM, whereas for the remanufactured product, it refers to the reduced BoM containing only the spare parts. Regarding transportation processes involved in the end-of-life, we assumed transport by articulated lorry over the same distances used in the EPD study, partly based on values recommended by the relevant PCRs (P.E.P. Association, 2015). We followed the same approach for the disposal of assembly residues, which, however, is included in the *Production* phase. Table A1 provides the aggregate list of linked *ecoinvent* datasets and associated total values for both the new and remanufactured products (*Disposal* section). The processes/flows related to the product packaging are reported separately.

---

<sup>2</sup> We modeled electric and electronic waste with particular care, differentiating it into more specific sub-streams and using more granular datasets.

| Activity                                                    | Ecoinvent Dataset <sup>a</sup>                                                                                                          | Unit  | New Product | Remanufactured Product |
|-------------------------------------------------------------|-----------------------------------------------------------------------------------------------------------------------------------------|-------|-------------|------------------------|
| <b><i>Production or Recovery</i></b>                        |                                                                                                                                         |       |             |                        |
| <i>Upstream transportation</i>                              | Transport, freight, lorry >32 metric ton, EURO6 {RER}  transport, freight, lorry >32 metric ton, EURO6                                  | kgkm  | 65906.264   | 13521.426              |
| <i>Reverse logistics</i>                                    | Transport, freight, lorry 16-32 metric ton, EURO6 {RER}  transport, freight, lorry 16-32 metric ton, EURO6                              | kgkm  | 0           | 8676                   |
| <i>Chemical components/items</i>                            | Barium oxide {GLO}  market for barium oxide                                                                                             | g     | 0.45480     | 0.00074                |
|                                                             | Cobalt oxide {GLO}  market for cobalt oxide                                                                                             | g     | 1.364       | 0.00222                |
|                                                             | Epoxy resin, liquid {RER}  epoxy resin production, liquid                                                                               | g     | 1.084       | 0                      |
|                                                             | Manganese dioxide {GLO}  market for manganese dioxide                                                                                   | g     | 0.90960     | 0.00148                |
|                                                             | Silica sand {DE}  silica sand production                                                                                                | g     | 89.270      | 87.520                 |
|                                                             | Silica sand {GLO}  market for silica sand                                                                                               | g     | 0.45480     | 0.00074                |
|                                                             | Silicone product {RoW}  silicone product production                                                                                     | g     | 29.338      | 11.284                 |
|                                                             | Zinc oxide {GLO}  market for zinc oxide                                                                                                 | g     | 42.296      | 0.06868                |
| <i>Electronic components/items</i>                          | Battery, Li-ion, LiMn2O4, rechargeable, prismatic {GLO}  battery production, Li-ion, LiMn2O4, rechargeable, prismatic                   | g     | 2.900       | 0                      |
|                                                             | Cable, three-conductor cable {GLO}  cable production, three-conductor cable                                                             | m     | 25.443      | 1.415                  |
|                                                             | Cable, unspecified {GLO}  cable production, unspecified – <b>modified</b> <sup>b</sup>                                                  | g     | 566.247     |                        |
|                                                             | Capacitor, electrolyte type, < 2cm height {GLO}  capacitor production, electrolyte type, < 2cm height                                   | g     | 26.110      | 9.763                  |
|                                                             | Capacitor, electrolyte type, > 2cm height {GLO}  capacitor production, electrolyte type, > 2cm height                                   | g     | 525         | 80.769                 |
|                                                             | Capacitor, film type, for through-hole mounting {GLO}  capacitor production, film type, for through-hole mounting                       | g     | 138.378     | 12.647                 |
|                                                             | Capacitor, for surface-mounting {GLO}  capacitor production, for surface-mounting                                                       | g     | 9.029       | 2.610                  |
|                                                             | Diode, glass-, for through-hole mounting {GLO}  diode production, glass-, for through-hole mounting                                     | g     | 1.756       | 0.67538                |
|                                                             | Electric connector, peripheral component interconnect buss {GLO}  electric connector production, peripheral component interconnect buss | g     | 43.510      | 5.661                  |
|                                                             | Electric connector, peripheral type buss {GLO}  electric connector production, peripheral type buss                                     | g     | 226.935     | 56.244                 |
|                                                             | Electric connector, wire clamp {GLO}  electric connector production, wire clamp                                                         | g     | 0.37500     | 0.09615                |
|                                                             | Electronic component, active, unspecified {GLO}  electronic component production, active, unspecified                                   | g     | 8.459       | 2.228                  |
|                                                             | Inductor, low value multilayer chip {GLO}  inductor production, low value multilayer chip                                               | g     | 6.157       | 0.845307692            |
|                                                             | Integrated circuit, logic type {GLO}  integrated circuit production, logic type                                                         | g     | 4.468       | 0.62360                |
|                                                             | Integrated circuit, memory type {GLO}  integrated circuit production, memory type                                                       | g     | 0.613       | 0.08560                |
| Light emitting diode {GLO}  light emitting diode production | g                                                                                                                                       | 5.280 | 2.024       |                        |

|                               |                                                                                                                                                     |    |          |         |
|-------------------------------|-----------------------------------------------------------------------------------------------------------------------------------------------------|----|----------|---------|
|                               | Liquid crystal display, unmounted, mobile device {GLO}  liquid crystal display production, unmounted, mobile device                                 | g  | 25       | 0       |
|                               | Mounting, surface mount technology, Pb-free solder {GLO}  mounting, surface mount technology, Pb-free solder                                        | m2 | 0.26281  | 0.05320 |
|                               | Mounting, through-hole technology, Pb-free solder {GLO}  mounting, through-hole technology, Pb-free solder                                          | m2 | 0.20725  | 0.04021 |
|                               | Plug, inlet and outlet, for computer cable {GLO}  plug production, inlet and outlet, for computer cable                                             | p  | 0.00641  | 0.00164 |
|                               | Plug, inlet and outlet, for network cable {GLO}  plug production, inlet and outlet, for network cable                                               | p  | 1.264    | 0.16087 |
|                               | Printed wiring board, for surface mounting, Pb free surface {GLO}  printed wiring board production, for surface mounting, Pb free surface           | m2 | 0.11589  | 0.02287 |
|                               | Printed wiring board, for through-hole mounting, Pb free surface {GLO}  printed wiring board production, for through-hole mounting, Pb free surface | m2 | 0.10531  | 0.01905 |
|                               | Resistor, surface-mounted {GLO}  resistor production, surface-mounted                                                                               | g  | 4.132    | 1.061   |
|                               | Resistor, wirewound, through-hole mounting {GLO}  resistor production, wirewound, through-hole mounting                                             | g  | 85.690   | 3.462   |
|                               | Switch, toggle type {RoW}  switch production, toggle type                                                                                           | g  | 42.200   | 12.262  |
|                               | Transformer, low voltage use {GLO}  transformer production, low voltage use                                                                         | g  | 1.520    | 0.58462 |
|                               | Transistor, surface-mounted {GLO}  transistor production, surface-mounted                                                                           | g  | 8.518    | 2.758   |
|                               | Transistor, wired, big size, through-hole mounting {GLO}  transistor production, wired, big size, through-hole mounting                             | g  | 4.430    | 1.704   |
|                               | Transistor, wired, small size, through-hole mounting {GLO}  transistor production, wired, small size, through-hole mounting                         | g  | 7.500    | 2.885   |
| <i>Metal components/items</i> | Aluminium scrap, new {RER}  treatment of aluminium scrap, new, at refiner                                                                           | g  | 766.687  | 0.32614 |
|                               | Aluminium scrap, new {RER}  treatment of aluminium scrap, new, at remelter                                                                          | g  | 538.975  | 0.22927 |
|                               | Aluminium, primary, ingot {IAI Area, EU27 & EFTA}  aluminium production, primary, ingot                                                             | g  | 1414.468 | 0.60170 |
|                               | Brass {RoW}  brass production                                                                                                                       | g  | 164.384  | 9.048   |
|                               | Brass removed by turning, average, conventional {RER}  brass turning, average, conventional                                                         | g  | 29.440   | 0       |
|                               | Bronze {RoW}  bronze production                                                                                                                     | g  | 3.282    | 0       |
|                               | Copper scrap, sorted, pressed {RER}  treatment of copper scrap by electrolytic refining                                                             | g  | 160.451  | 5.873   |
|                               | Copper, cathode {GLO}  copper production, cathode, solvent extraction and electrowinning process                                                    | g  | 198.159  | 7.253   |
|                               | Copper, cathode {GLO}  electrorefining of copper, anode                                                                                             | g  | 703.146  | 25.735  |
|                               | Copper, cathode {SE}  gold mine operation and refining                                                                                              | g  | 7.917    | 0.28975 |
|                               | Ferrite {GLO}  ferrite production                                                                                                                   | g  | 9.266    | 0       |
|                               | Forging, steel {GLO}  market for forging, steel                                                                                                     | g  | 1148.324 | 6.852   |
|                               | Iron pellet {RoW}  iron pellet production                                                                                                           | g  | 2168.386 | 0       |

|                                 |                                                                                                                         |     |           |         |
|---------------------------------|-------------------------------------------------------------------------------------------------------------------------|-----|-----------|---------|
|                                 | Metal working, average for steel product manufacturing {RER}  metal working, average for steel product manufacturing    | g   | 1808.947  | 1.347   |
|                                 | Powder coat, steel {RER}  powder coating, steel                                                                         | mm2 | 49127.900 | 0       |
|                                 | Reinforcing steel {Europe without Austria}  reinforcing steel production                                                | g   | 90.896    | 3.497   |
|                                 | Section bar extrusion, aluminium {RER}  section bar extrusion, aluminium                                                | g   | 2483.658  | 0       |
|                                 | Section bar rolling, steel {GLO}  market for section bar rolling, steel                                                 | g   | 10.940    | 3.366   |
|                                 | Sheet rolling, copper {RER}  sheet rolling, copper                                                                      | g   | 29.754    | 1.258   |
|                                 | Sheet rolling, steel {GLO}  market for sheet rolling, steel                                                             | g   | 2344.307  | 1.474   |
|                                 | Sheet rolling, steel {RER}  sheet rolling, steel                                                                        | g   | 193.659   | 35.575  |
|                                 | Steel removed by milling, average {RER}  steel milling, average                                                         | g   | 24.617    | 0.19462 |
|                                 | Steel removed by turning, average, conventional {RER}  steel turning, average, conventional                             | g   | 28.067    | 1.079   |
|                                 | Steel, chromium steel 18/8 {RER}  steel production, electric, chromium steel 18/8                                       | g   | 4.595     | 0       |
|                                 | Steel, low-alloyed {GLO}  market for steel, low-alloyed                                                                 | g   | 943.095   | 14.954  |
|                                 | Steel, unalloyed {GLO}  market for steel, unalloyed                                                                     | g   | 1605.811  | 25.461  |
|                                 | Wire drawing, copper {RER}  wire drawing, copper                                                                        | g   | 858.237   | 0       |
|                                 | Zinc {RoW}  primary zinc production from concentrate                                                                    | g   | 89.839    | 0       |
|                                 | Zinc coat, coils {GLO}  market for zinc coat, coils                                                                     | m2  | 0.10713   | 0.00007 |
|                                 | Zinc coat, coils {RER}  zinc coating, coils                                                                             | m2  | 0.00885   | 0.00163 |
|                                 | Zinc coat, pieces {RER}  zinc coating, pieces                                                                           | mm2 | 2292      | 48.923  |
| <i>Paper components/items</i>   | Acrylic varnish, with water, in 53% solution state {RER}  acrylic varnish production, with water, in 53% solution state | g   | 69.786    | 69.786  |
|                                 | Containerboard, linerboard {RER}  containerboard production, linerboard, kraftliner                                     | g   | 34.974    | 34.974  |
|                                 | Containerboard, linerboard {RER}  containerboard production, linerboard, testliner                                      | g   | 63.486    | 63.486  |
|                                 | Corrugated board box {RER}  corrugated board box production                                                             | g   | 2724      | 2724    |
|                                 | Paper, woodcontaining, lightweight coated {RER}  paper production, woodcontaining, lightweight coated                   | g   | 109.501   | 79.147  |
| <i>Plastic components/items</i> | Acrylonitrile {RER}  acrylonitrile production, Sohio process                                                            | g   | 2.818     | 0       |
|                                 | Extrusion, plastic film {RER}  extrusion, plastic film                                                                  | g   | 31.819    | 30.017  |
|                                 | Extrusion, plastic pipes {RER}  extrusion, plastic pipes                                                                | g   | 3.630     | 0       |
|                                 | Injection moulding {RER}  injection moulding                                                                            | g   | 3467.754  | 38.858  |
|                                 | Nylon 6 {RER}  nylon 6 production                                                                                       | g   | 39.384    | 0       |
|                                 | Nylon 6-6 {RER}  market for nylon 6-6                                                                                   | g   | 27.105    | 0       |
|                                 | Nylon 6-6 {RER}  nylon 6-6 production                                                                                   | g   | 39.384    | 0       |

|                                                                 |                                                                                                                                                    |      |            |           |
|-----------------------------------------------------------------|----------------------------------------------------------------------------------------------------------------------------------------------------|------|------------|-----------|
|                                                                 | Nylon 6-6, glass-filled {RER}  nylon 6-6 production, glass-filled                                                                                  | g    | 4.337      | 0         |
|                                                                 | Polybutadiene {RER}  polybutadiene production                                                                                                      | g    | 6.574      | 0         |
|                                                                 | Polycarbonate {RER}  market for polycarbonate                                                                                                      | g    | 0.21880    | 0.01683   |
|                                                                 | Polycarbonate {RER}  polycarbonate production                                                                                                      | g    | 2725.448   | 31.483    |
|                                                                 | Polyethylene terephthalate, granulate, amorphous {RER}  polyethylene terephthalate production, granulate, amorphous                                | g    | 18.828     | 0         |
|                                                                 | Polyethylene terephthalate, granulate, amorphous {RER}  polyethylene terephthalate production, granulate, amorphous – <b>modified</b> <sup>c</sup> | g    | 66.871     | 0         |
|                                                                 | Polyethylene, high density, granulate {RER}  polyethylene production, high density, granulate                                                      | g    | 152.230    | 36.436    |
|                                                                 | Polyethylene, low density, granulate {RER}  polyethylene production, low density, granulate                                                        | g    | 32.820     | 32.820    |
|                                                                 | Polyphenylene sulfide {GLO}  polyphenylene sulfide production                                                                                      | g    | 38.257     | 14.714    |
|                                                                 | Polypropylene, granulate {GLO}  market for polypropylene, granulate                                                                                | g    | 131.776    | 0         |
|                                                                 | Polyurethane, flexible foam {RER}  polyurethane production, flexible foam, TDI-based, low density                                                  | g    | 0.196920   | 0         |
|                                                                 | Synthetic rubber {RoW}  synthetic rubber production                                                                                                | g    | 32.147     | 0         |
|                                                                 | Triphenyl phosphate {GLO}  triphenyl phosphate production                                                                                          | g    | 880.373    | 10.200    |
| <i>Textile components/items</i>                                 | Fibre, polyester {RoW}  polyester fibre production, finished                                                                                       | g    | 0.10940    | 0         |
| <i>Processes losses disposal</i>                                | Transport, freight, lorry >32 metric ton, EURO6 {RER}  transport, freight, lorry >32 metric ton, EURO6                                             | kgkm | 1582.036   | 106.193   |
|                                                                 | Waste electric and electronic equipment {GLO}  treatment of waste electric and electronic equipment, shredding                                     | kg   | 0.05347    | 0.00927   |
|                                                                 | Used printed wiring boards {RoW}  treatment of scrap printed wiring boards, shredding and separation                                               | kg   | 0.05347    | 0.00927   |
|                                                                 | Scrap steel {Europe without Switzerland}  treatment of scrap steel, inert material landfill                                                        | kg   | 0.04075    | 0.00008   |
|                                                                 | Waste plastic, mixture {CH}  treatment of waste plastic, mixture, sanitary landfill                                                                | kg   | 0.02087    | 0.00094   |
|                                                                 | Waste glass {CH}  treatment of waste glass, inert material landfill                                                                                | kg   | 0.00305    | 0.00001   |
|                                                                 | Waste graphical paper {CH}  treatment of waste graphical paper, sanitary landfill                                                                  | kg   | 0.00150    | 0.00040   |
|                                                                 | Municipal solid waste {RoW}  treatment of municipal solid waste, sanitary landfill                                                                 | kg   | 0.02617    | 0.00363   |
|                                                                 | Waste glass {CH}  treatment of waste glass, municipal incineration FAE                                                                             | kg   | 1.028E-05  | 0         |
|                                                                 | Municipal solid waste {RoW}  treatment of municipal solid waste, municipal incineration                                                            | kg   | 1.486E-02  | 0.00396   |
| <b>Distribution</b>                                             |                                                                                                                                                    |      |            |           |
| <i>Transportation from assembly site to distribution center</i> | Transport, freight, sea, container ship {GLO}  transport, freight, sea, container ship                                                             | kgkm | 333712.980 | 67538.925 |
|                                                                 | Transport, freight, lorry >32 metric ton, EURO6 {RER}  transport, freight, lorry >32 metric ton, EURO6                                             | kgkm | 4487.220   | 908.152   |
|                                                                 | Transport, freight, lorry >32 metric ton, EURO6 {RER}  transport, freight, lorry >32 metric ton, EURO6                                             | kgkm | 10476      | 10476     |

|                                                            |                                                                                                                |      |           |           |
|------------------------------------------------------------|----------------------------------------------------------------------------------------------------------------|------|-----------|-----------|
| <i>Transportation from distribution center to customer</i> | Transport, freight, lorry 16-32 metric ton, EURO6 {RER}  transport, freight, lorry 16-32 metric ton, EURO6     | kgkm | 3492      | 3492      |
| <b>Use</b>                                                 |                                                                                                                |      |           |           |
| <i>Average European user</i>                               | Electricity, low voltage {Europe without Switzerland}  market group for electricity, low voltage               | kWh  | 31115.520 | 31115.520 |
| <b>Disposal</b>                                            |                                                                                                                |      |           |           |
| <i>Product disposal</i>                                    | Transport, freight, lorry >32 metric ton, EURO6 {RER}  transport, freight, lorry >32 metric ton, EURO6         | kgkm | 16862.466 | 778.982   |
|                                                            | Waste electric and electronic equipment {GLO}  treatment of waste electric and electronic equipment, shredding | kg   | 14.303    | 0.54141   |
|                                                            | Used cable {GLO}  treatment of used cable                                                                      | kg   | 0.54973   | 0.01668   |
|                                                            | Used liquid crystal display {RoW}  treatment of used liquid crystal display, manual dismantling                | kg   | 0.02500   | 0         |
|                                                            | Used printed wiring boards {RoW}  treatment of scrap printed wiring boards, shredding and separation           | kg   | 2.246     | 0.44190   |
|                                                            | Used Ni-metal hydride battery {GLO}  treatment of used Ni-metal hydride battery, pyrometallurgical treatment   | kg   | 0.00290   | 0         |
|                                                            | Municipal solid waste {RoW}  treatment of municipal solid waste, municipal incineration                        | kg   | 0.78318   | 0.12993   |
| <i>Packaging disposal</i>                                  | Municipal solid waste {RoW}  treatment of municipal solid waste, sanitary landfill                             | kg   | 2.497     | 0.27762   |
|                                                            | Transport, freight, lorry >32 metric ton, EURO6 {RER}  transport, freight, lorry >32 metric ton, EURO6         | kgkm | 2996.200  | 2996.200  |
|                                                            | Waste plastic, mixture {CH}  treatment of waste plastic, mixture, sanitary landfill                            | kg   | 0.02136   | 0.02136   |
|                                                            | Waste glass {CH}  treatment of waste glass, inert material landfill                                            | kg   | 0.02120   | 0.02120   |
|                                                            | Waste graphical paper {CH}  treatment of waste graphical paper, sanitary landfill                              | kg   | 0.01443   | 0.01443   |

<sup>a</sup> *ecoinvent v3.10* was used as the source of background data for this study (Wernet et al., 2016)

<sup>b</sup> dataset modified to exclude copper-related inputs, as these had already been included/ modeled with ad-hoc datasets

<sup>c</sup> dataset modified by changing the input monomer used (1,4-butanediol instead of ethylene glycol) to represent the production of polybutylene terephthalate (PBT). Assumption deemed reasonable since PET and PBT have a similar chemical composition and production process.

**Table A1** Background datasets used for the LCI

## B.2 Life Cycle Impact Assessment Results

| Impact Category                          | Unit                             | New Product                 |                          |                       |                          |                         | Remanufactured Product      |                       |                       |                          |                         | DR <sub>B.E.</sub>       |
|------------------------------------------|----------------------------------|-----------------------------|--------------------------|-----------------------|--------------------------|-------------------------|-----------------------------|-----------------------|-----------------------|--------------------------|-------------------------|--------------------------|
|                                          |                                  | Total                       | Production               | Distribution          | Use                      | Disposal                | Total                       | Recovery              | Distribution          | Use                      | Disposal                |                          |
| <i>Acidification</i>                     | mol H <sup>+</sup> <sub>eq</sub> | 6.95E+01<br><i>7.27E+00</i> | 13.63%<br><i>155.67%</i> | 0.15%<br><i>1.44%</i> | 86.20%<br><i>527.03%</i> | 0.02%<br><i>-584.1%</i> | 6.06E+01<br><i>3.09E+01</i> | 1.05%<br><i>2.73%</i> | 0.04%<br><i>0.08%</i> | 98.90%<br><i>124.10%</i> | 0.00%<br><i>-26.91%</i> | 87.16%<br><i>424.67%</i> |
| <i>Climate change</i>                    | kg CO <sub>2eq</sub>             | 1.06E+04<br><i>7.60E+03</i> | 3.27%<br><i>5.54%</i>    | 0.05%<br><i>0.08%</i> | 96.63%<br><i>93.75%</i>  | 0.05%<br><i>0.64%</i>   | 1.03E+04<br><i>7.18E+03</i> | 0.35%<br><i>0.51%</i> | 0.02%<br><i>0.04%</i> | 99.61%<br><i>99.31%</i>  | 0.01%<br><i>0.14%</i>   | 97.00%<br><i>94.39%</i>  |
| <i>Ecotoxicity, freshwater</i>           | CTU <sub>e</sub>                 | 5.56E+04<br><i>5.24E+04</i> | 23.74%<br><i>18.19%</i>  | 0.03%<br><i>0.04%</i> | 76.14%<br><i>80.22%</i>  | 0.09%<br><i>1.56%</i>   | 4.33E+04<br><i>4.29E+04</i> | 2.24%<br><i>1.63%</i> | 0.02%<br><i>0.03%</i> | 97.73%<br><i>97.93%</i>  | 0.01%<br><i>0.42%</i>   | 77.91%<br><i>81.92%</i>  |
| <i>Particulate matter</i>                | disease inc.                     | 2.46E-04<br><i>2.17E-04</i> | 13.01%<br><i>15.61%</i>  | 0.12%<br><i>0.14%</i> | 86.77%<br><i>95.17%</i>  | 0.10%<br><i>-10.91%</i> | 2.17E-04<br><i>2.05E-04</i> | 1.27%<br><i>1.25%</i> | 0.08%<br><i>0.09%</i> | 98.63%<br><i>100.90%</i> | 0.02%<br><i>-2.23%</i>  | 87.97%<br><i>94.32%</i>  |
| <i>Eutrophication, marine</i>            | kg N <sub>eq</sub>               | 1.01E+01<br><i>7.99E+00</i> | 6.48%<br><i>11.13%</i>   | 0.26%<br><i>0.33%</i> | 93.20%<br><i>84.62%</i>  | 0.06%<br><i>3.92%</i>   | 9.47E+00<br><i>6.90E+00</i> | 0.62%<br><i>0.91%</i> | 0.06%<br><i>0.09%</i> | 99.30%<br><i>98.07%</i>  | 0.01%<br><i>0.93%</i>   | 93.86%<br><i>86.29%</i>  |
| <i>Eutrophication, freshwater</i>        | kg P <sub>eq</sub>               | 1.03E+01<br><i>5.47E+00</i> | 7.71%<br><i>8.37%</i>    | 0.00%<br><i>0.01%</i> | 92.28%<br><i>90.18%</i>  | 0.01%<br><i>1.45%</i>   | 9.54E+00<br><i>4.99E+00</i> | 0.60%<br><i>0.74%</i> | 0.00%<br><i>0.00%</i> | 99.40%<br><i>98.92%</i>  | 0.00%<br><i>0.34%</i>   | 92.84%<br><i>91.16%</i>  |
| <i>Eutrophication, terrestrial</i>       | mol N <sub>eq</sub>              | 9.29E+01<br><i>8.75E+01</i> | 9.00%<br><i>13.85%</i>   | 0.31%<br><i>0.33%</i> | 90.66%<br><i>80.46%</i>  | 0.03%<br><i>5.35%</i>   | 8.50E+01<br><i>7.23E+01</i> | 0.81%<br><i>1.17%</i> | 0.08%<br><i>0.09%</i> | 99.11%<br><i>97.41%</i>  | 0.00%<br><i>1.33%</i>   | 91.47%<br><i>82.60%</i>  |
| <i>Human toxicity, cancer</i>            | CTU <sub>h</sub>                 | 2.72E-05<br><i>6.00E-05</i> | 11.83%<br><i>10.56%</i>  | 0.11%<br><i>0.08%</i> | 88.00%<br><i>88.04%</i>  | 0.06%<br><i>1.33%</i>   | 2.41E-05<br><i>5.34E-05</i> | 0.86%<br><i>0.73%</i> | 0.06%<br><i>0.05%</i> | 99.07%<br><i>98.91%</i>  | 0.01%<br><i>0.32%</i>   | 88.83%<br><i>89.01%</i>  |
| <i>Human toxicity, non-cancer</i>        | CTU <sub>h</sub>                 | 2.55E-04<br><i>2.93E-04</i> | 35.08%<br><i>41.10%</i>  | 0.01%<br><i>0.01%</i> | 64.88%<br><i>51.12%</i>  | 0.02%<br><i>7.77%</i>   | 1.71E-04<br><i>1.62E-04</i> | 3.16%<br><i>4.33%</i> | 0.01%<br><i>0.01%</i> | 96.82%<br><i>92.59%</i>  | 0.00%<br><i>3.07%</i>   | 67.01%<br><i>55.21%</i>  |
| <i>Ionising radiation</i>                | kBq U-235 <sub>eq</sub>          | 6.58E+03<br><i>2.54E+03</i> | 0.52%<br><i>0.79%</i>    | 0.00%<br><i>0.00%</i> | 99.48%<br><i>99.30%</i>  | 0.00%<br><i>-0.09%</i>  | 6.55E+03<br><i>2.53E+03</i> | 0.05%<br><i>0.08%</i> | 0.00%<br><i>0.00%</i> | 99.95%<br><i>99.94%</i>  | 0.00%<br><i>-0.02%</i>  | 99.53%<br><i>99.36%</i>  |
| <i>Land use</i>                          | Pt                               | 5.65E+04<br><i>1.76E+05</i> | 6.58%<br><i>5.51%</i>    | 0.06%<br><i>0.02%</i> | 93.30%<br><i>93.12%</i>  | 0.06%<br><i>1.35%</i>   | 5.32E+04<br><i>1.65E+05</i> | 0.76%<br><i>0.54%</i> | 0.05%<br><i>0.02%</i> | 99.18%<br><i>99.14%</i>  | 0.01%<br><i>0.30%</i>   | 94.07%<br><i>93.93%</i>  |
| <i>Ozone depletion</i>                   | kg CFC11 <sub>eq</sub>           | 1.96E-04<br><i>2.19E-04</i> | 4.05%<br><i>5.45%</i>    | 0.05%<br><i>0.04%</i> | 95.88%<br><i>94.51%</i>  | 0.03%<br><i>-0.01%</i>  | 1.89E-04<br><i>2.08E-04</i> | 0.44%<br><i>0.47%</i> | 0.03%<br><i>0.02%</i> | 99.53%<br><i>99.50%</i>  | 0.00%<br><i>0.00%</i>   | 96.33%<br><i>94.98%</i>  |
| <i>Photochemical ozone formation</i>     | kg NMVOC <sub>eq</sub>           | 3.05E+01<br><i>2.57E+01</i> | 8.83%<br><i>13.71%</i>   | 0.27%<br><i>0.33%</i> | 90.86%<br><i>92.21%</i>  | 0.04%<br><i>-6.24%</i>  | 2.80E+01<br><i>2.37E+01</i> | 0.84%<br><i>1.17%</i> | 0.08%<br><i>0.09%</i> | 99.07%<br><i>100.02%</i> | 0.01%<br><i>-1.29%</i>  | 91.71%<br><i>92.19%</i>  |
| <i>Resource use, fossils</i>             | MJ                               | 2.42E+05<br><i>1.46E+05</i> | 2.15%<br><i>4.16%</i>    | 0.03%<br><i>0.05%</i> | 97.81%<br><i>95.51%</i>  | 0.02%<br><i>0.27%</i>   | 2.38E+05<br><i>1.40E+05</i> | 0.21%<br><i>0.37%</i> | 0.01%<br><i>0.03%</i> | 99.77%<br><i>99.54%</i>  | 0.00%<br><i>0.06%</i>   | 98.03%<br><i>95.95%</i>  |
| <i>Resource use, minerals and metals</i> | kg Sb <sub>eq</sub>              | 2.68E-01<br><i>6.21E-01</i> | 48.86%<br><i>54.81%</i>  | 0.00%<br><i>0.00%</i> | 51.13%<br><i>42.72%</i>  | 0.00%<br><i>2.47%</i>   | 1.47E-01<br><i>2.92E-01</i> | 7.18%<br><i>7.80%</i> | 0.00%<br><i>0.00%</i> | 92.82%<br><i>90.72%</i>  | 0.00%<br><i>1.48%</i>   | 55.09%<br><i>47.09%</i>  |
| <i>Water use</i>                         | m <sup>3</sup> depriv.           | 3.13E+03<br><i>2.19E+03</i> | 6.09%<br><i>12.51%</i>   | 0.01%<br><i>0.01%</i> | 93.90%<br><i>86.46%</i>  | 0.00%<br><i>1.02%</i>   | 2.96E+03<br><i>1.92E+03</i> | 0.54%<br><i>0.96%</i> | 0.00%<br><i>0.01%</i> | 99.45%<br><i>98.76%</i>  | 0.00%<br><i>0.27%</i>   | 94.41%<br><i>87.55%</i>  |

**Table A2** Full LCIA results for new and remanufactured products and associated break-even DRs with an ALCA (regular text) or CLCA (italic text) background

## Appendix C – Products with Production-dominated Environmental Profiles

This section applies the conceptual framework developed in the manuscript to a smartphone. Unlike the industrial electronic device examined in the manuscript, smartphones typically have use-dominated environmental profiles (Zink et al., 2014) and relatively low recovery and processing costs (Ovchinnikov et al., 2014). Specifically, the example focuses on a smartphone model renowned for its CE features, for which the producing company commissioned and published an LCA report<sup>3</sup>, and shared relevant economic data with us regarding its refurbishing. In fact, the company's refurbishing program was launched with this specific model.

The LCA report specifies a carbon footprint of 39.5 kg CO<sub>2eq</sub> for the new product, with the following breakdown: 81.5% from *Production*, 1.5% from *Distribution*, 21.3% from *Use*, and -4.2% from *Disposal*. Importantly, this LCA study employs different boundary definitions, modeling assumptions, and databases than our primary case study. Specifically, the results refer to an ALCA background only, though substitution is used for recycling, as evidenced by the negative *Disposal* contribution. We leveraged the report's data to estimate the carbon footprint of the refurbished version (12.3 kg CO<sub>2eq</sub>), with a breakdown of: 31.8% from *Recovery*, 0.4% from *Distribution*, 68.3% from *Use*, and -0.5% from *Disposal*<sup>4</sup>. This implies a  $DR_{B.E.}$  of 31.1%, demonstrating that products with production-dominated profiles are superior candidates for refurbishing/remanufacturing. Indeed, a significantly lower displacement is needed to achieve environmental savings.

Regarding the endogenous  $DR$ , we calibrated the economic model following the same procedure as in our primary case study. The parameter values differed significantly in this instance: the company was able to collect a relatively larger number of used products ( $\alpha=9.5\%$ ) and the processing cost was substantially lower relative to the new production cost ( $c_r=19.4\% c_n$ )<sup>5</sup>. This low-cost structure represents another key differentiating feature for this product. The calibrated model returned a value of 62.2% for  $DR^*$ , which is considerably lower than in the primary case, indicating a larger rebound effect. However, because the break-even value mentioned above is so low, the company remains safely above the threshold. Figure A1 replicates the analysis of Figure 4 in the manuscript for this product. As illustrated, the company always remains within the constrained regime in this case, primarily due to the low collection and processing costs. Indeed, the profit margin on the secondary product is sufficiently high that it is always profitable to recondition as many units as possible. These considerations point toward a win-win solution for this product type: expanding the refurbishing program is likely to both reduce corporate emissions and increase the firm's profit.

---

<sup>3</sup> Details on the report are available from the authors upon request.

<sup>4</sup> Details on this estimation are available from the authors upon request. Notably, as in the primary case study, we assume that secondary products have the same use span and use profile as new products.

<sup>5</sup> As with the primary case, we cannot disclose the other parameter values due to confidentiality.

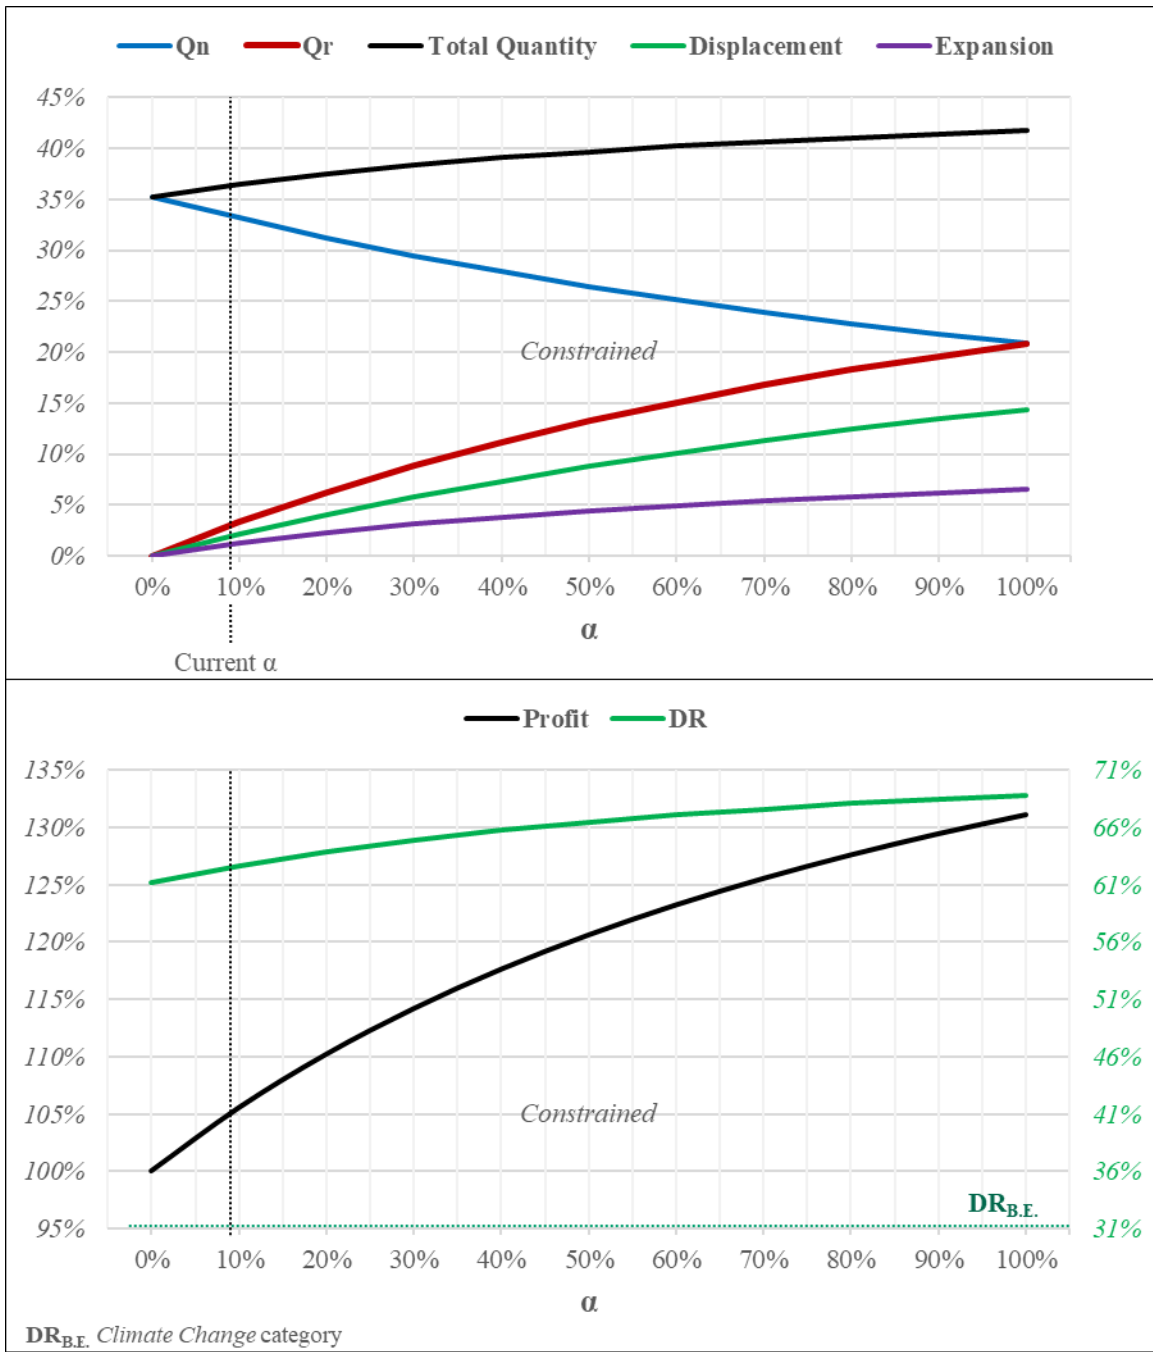

**Fig. A1** Optimal quantities (upper panel), profit and DR (lower panel) for the smartphone example

## References

- Ardente, F., Talens Peiró, L., Mathieux, F., & Polverini, D. (2018). Accounting for the environmental benefits of remanufactured products: Method and application. *Journal of Cleaner Production*, *198*, 1545–1558. <https://doi.org/10.1016/j.jclepro.2018.07.012>
- Ovchinnikov, A., Blass, V., & Raz, G. (2014). Economic and environmental assessment of remanufacturing strategies for product + service firms. *Production and Operations Management*, *23*(5), 744–761. <https://doi.org/10.1111/poms.12070>
- P.E.P. Association. (2015). *PEP ecopassport® PROGRAM Product Category Rules for Electrical, Electronic and HVAC-R Products*. <https://register.pep-ecopassport.org/documents>
- Schneider Electric. (n.d.). *Environmental Product Declaration*. Anonymized for confidentiality.
- Wernet, G., Bauer, C., Steubing, B., Reinhard, J., Moreno-Ruiz, E., & Weidema, B. (2016). The ecoinvent database version 3 (part I): overview and methodology. *The International Journal of Life Cycle Assessment*, *21*(9), 1218–1230. <https://doi.org/10.1007/s11367-016-1087-8>
- Zink, T., Maker, F., Geyer, R., Amirtharajah, R., & Akella, V. (2014). Comparative life cycle assessment of smartphone reuse: Repurposing vs. refurbishment. *International Journal of Life Cycle Assessment*, *19*(5), 1099–1109. <https://doi.org/10.1007/s11367-014-0720-7>
